# Supplementary material for: Assessment of multidrug-resistant Listeria monocytogenes in milk and milk product and One Health perspective
Source: PubMed Central journal article supplement (PMC9258876; doi:10.1371/journal.pone.0270993), 2022-07-06
Supplement: pone.0270993.s002.pdf [file pone.0270993.s002.pdf]

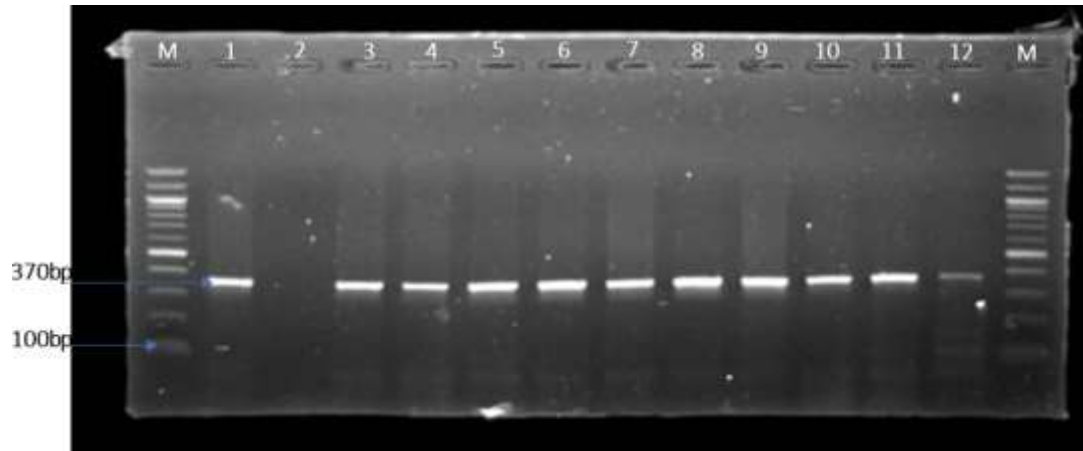

**S1a Fig.** Gel image of the *prs* gene (370 bp) of *Listeria* genus. Lane M: 100 bp DNA ladder, lane 1: +ve control (*Listeria. monocytogenes* ATCC 19118), lane 2: -ve control, lane 3-12 positive *Listeria* genus.

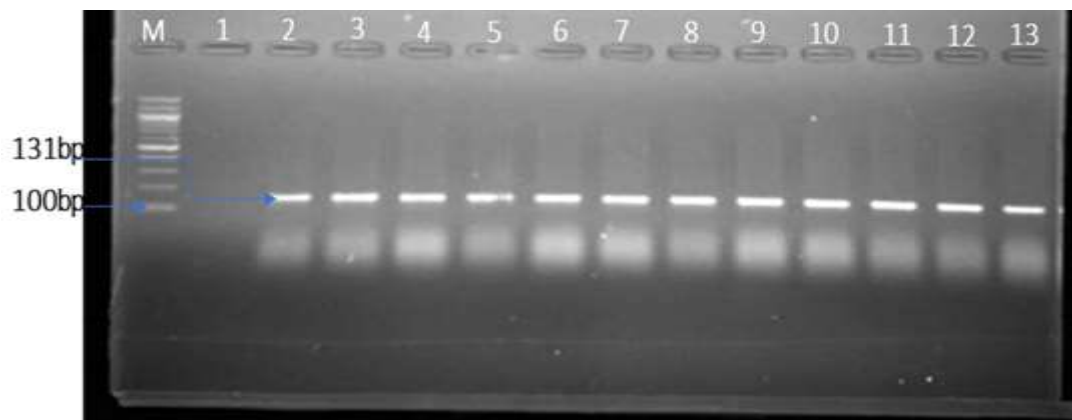

**S1b Fig.** Gel image of the *iap* gene (131 bp) of *L. monocytogenes*. Lane M: 100 bp DNA ladder, lane 1: -ve control, lane 2: +ve control (*L. monocytogenes* ATCC 19118), lane 3-13 positive *Listeria* genus.

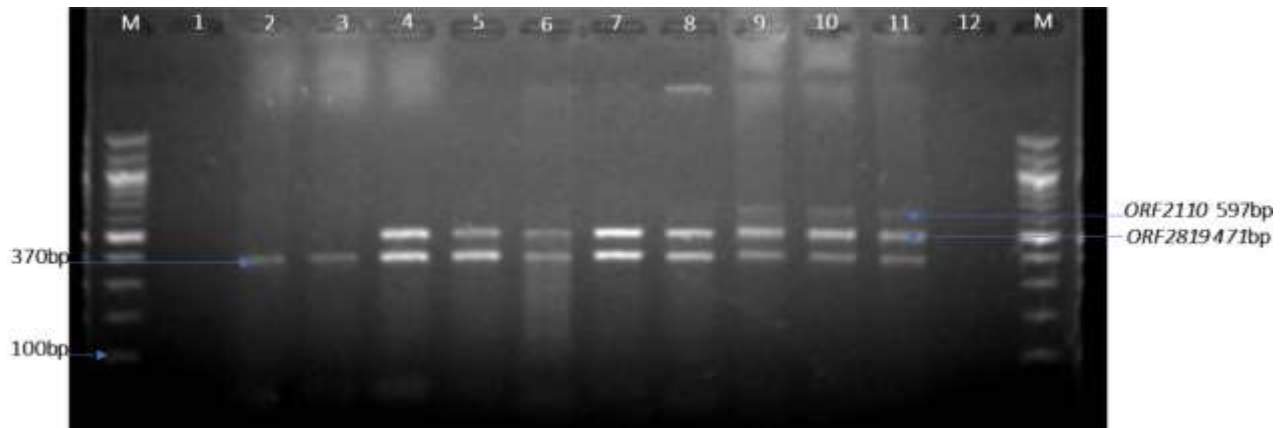

**S2 Fig. Multiplex PCR of positive serotypes 4a and 1/2b strains of *L. monocytogenes*.** Lane M:100 bp DNA ladder; lane 1 and 12: -ve control; lane 9 - 11: positive serotype 4b strains; lane 4 - 8: positive serotype 1/2b strains. All *Listeria monocytogenes* strains amplified the *prs* gene fragment (lane 2-11). Genes corresponding to the amplified fragment and their molecular sizes are shown on the left.

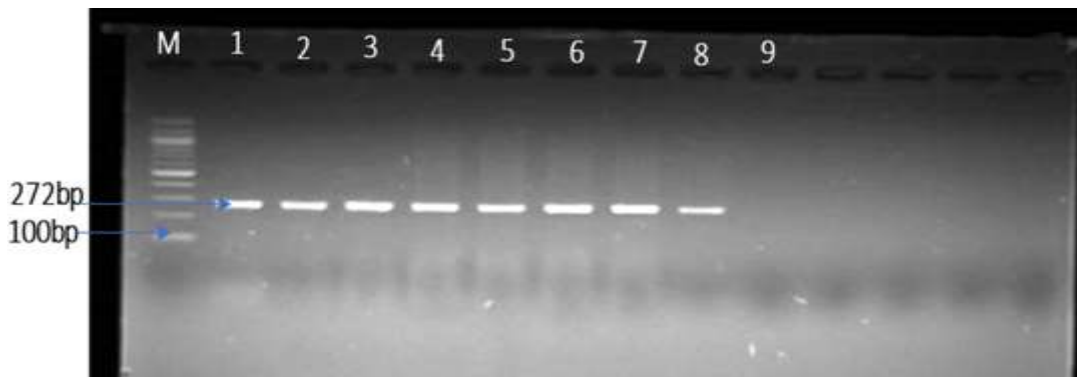

**S3a Fig. Gel image of the *inlB* gene (272 bp) of *L. monocytogenes*.** Lane M: 100 bp DNA ladder, lane 1-8: positive *L. monocytogenes* positive for *inlB* gene, lane 9: -ve control.

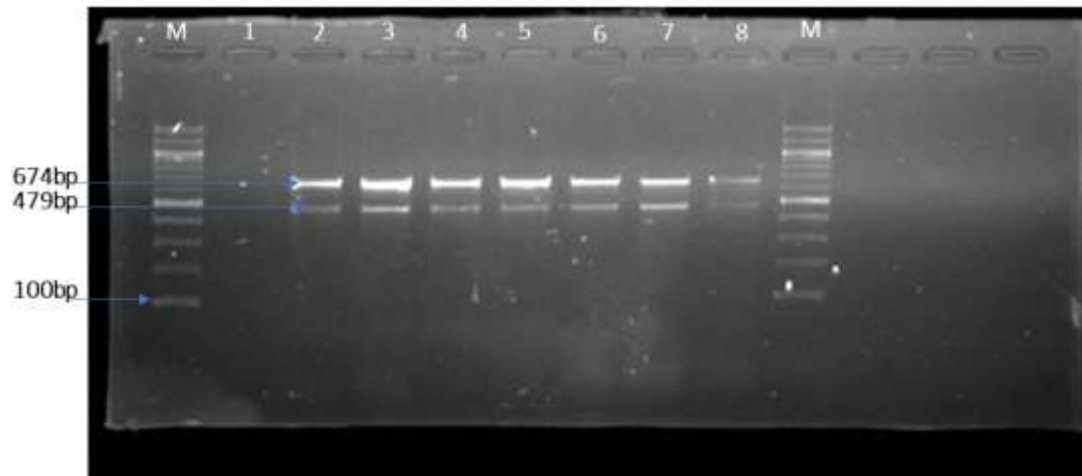

**S3b Fig.** Gel image of the *plcA* (674 bp) and *prfA* (479 bp) gene of *L. monocytogenes*. Lane M: 100 bp DNA ladder, lane 1: -ve control, lane 2-8 *plcA* and *prfA* genes.

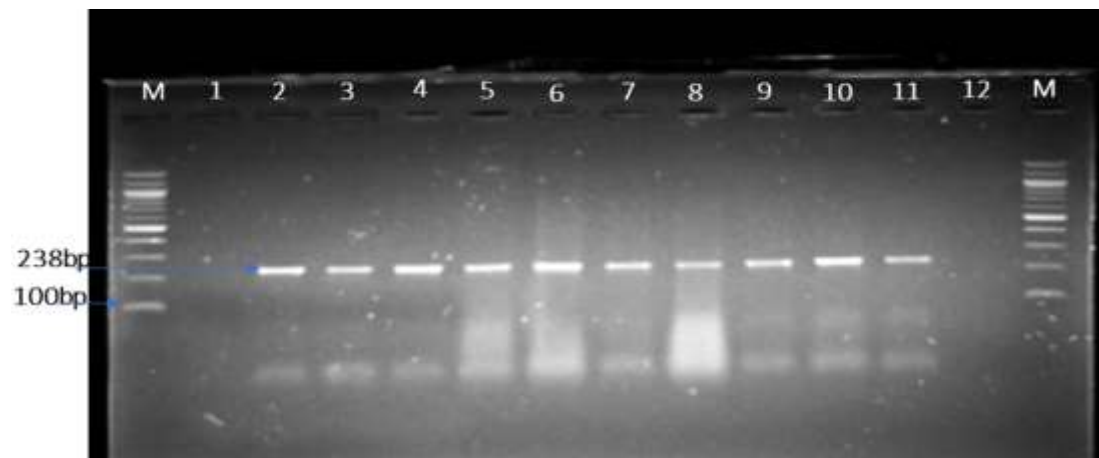

**S3c Fig.** Gel image of the *inlJ* (238 bp) gene of *L. monocytogenes*. Lane M: 100 bp DNA ladder, lane 1: -ve control, lane 2-12 *inlJ* genes.

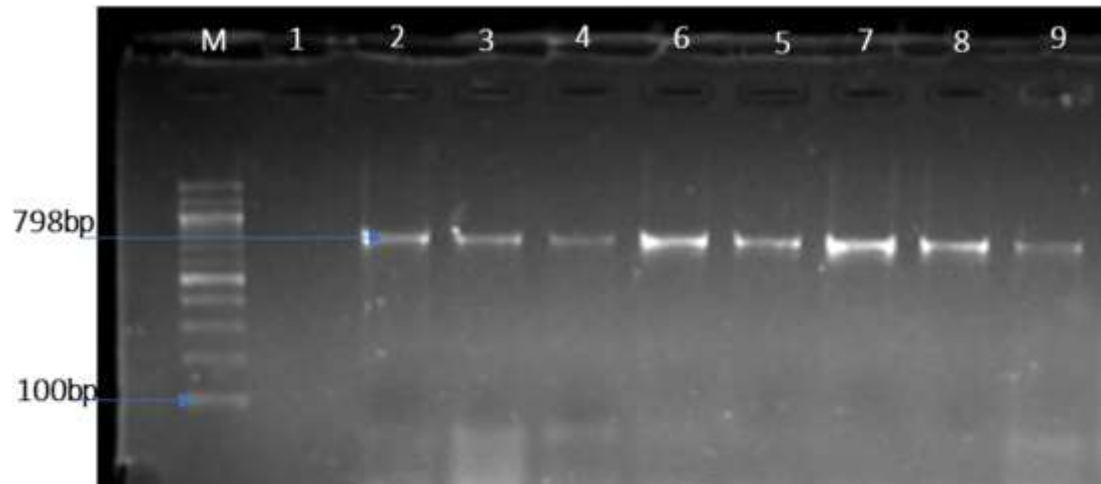

**S3d Fig.** Gel image of the *mpl* (798 bp) gene of *L. monocytogenes*. Lane M: 100 bp DNA ladder, lane 1: -ve control, lane 2-9 *mpl* genes.

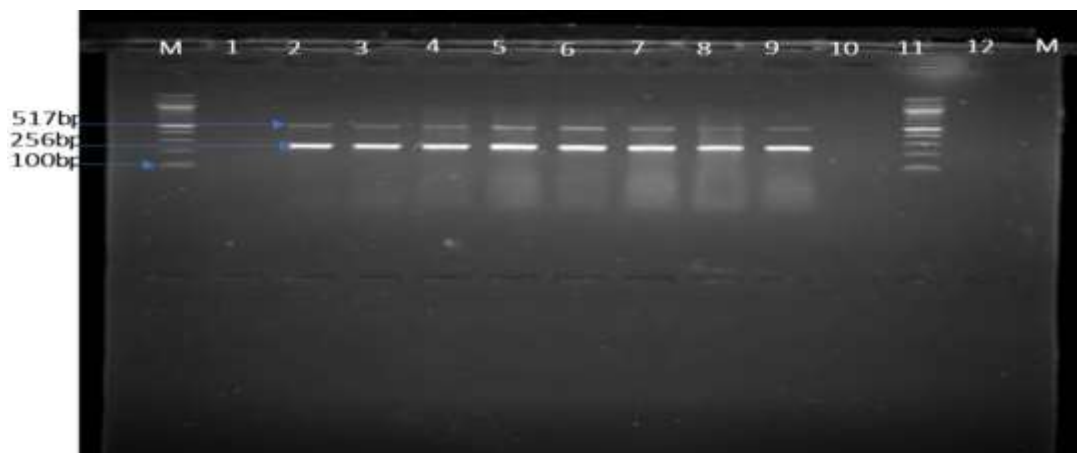

**S3e Fig.** Gel image of the *inlC* (517 bp) and *inlA* (256 bp) gene of *L. monocytogenes*. Lane M: 100 bp DNA ladder, lane 1 and 12: -ve control, lane 2-9 *inlC* and *inlA* genes.

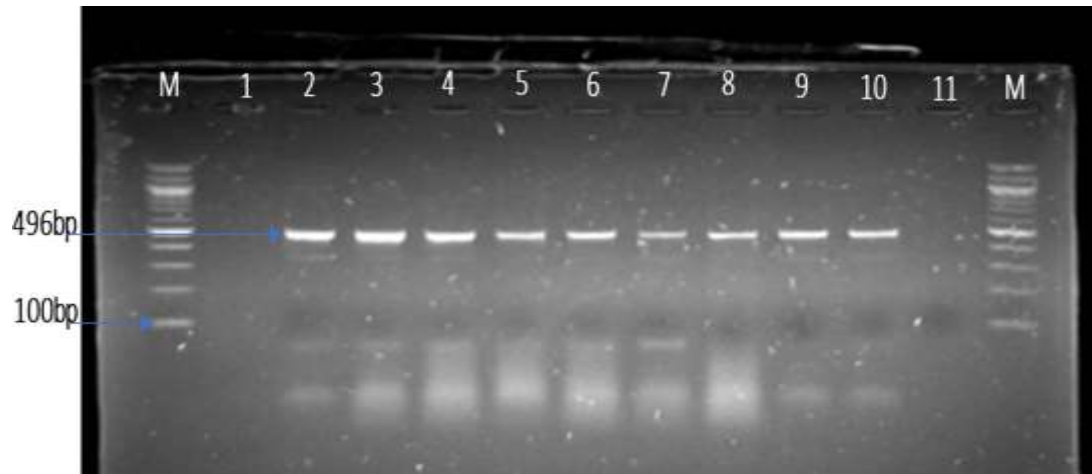

**3f Fig.** Gel image of the *hlyA* (496 bp) gene of *L. monocytogenes*. Lane M: 100 bp DNA ladder, lane 1 and 11: -ve control, lane 2-10 *hly* gene.

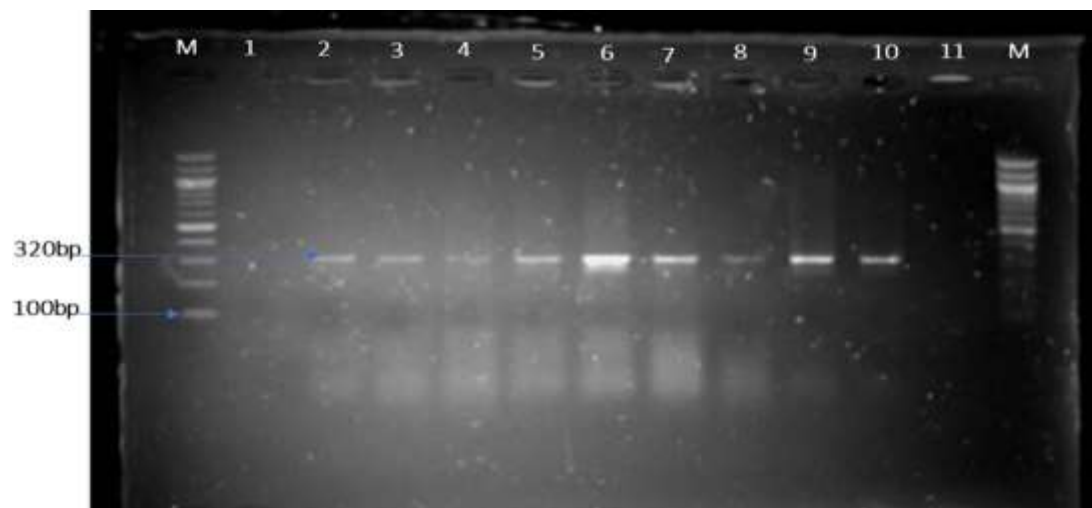

**S3g Fig.** Gel image of the *plcB* (320 bp) gene of *L. monocytogenes*. Lane M: 100 bp DNA ladder, lane 1 and 11: -ve control, lane 2-10 *plcB* gene.

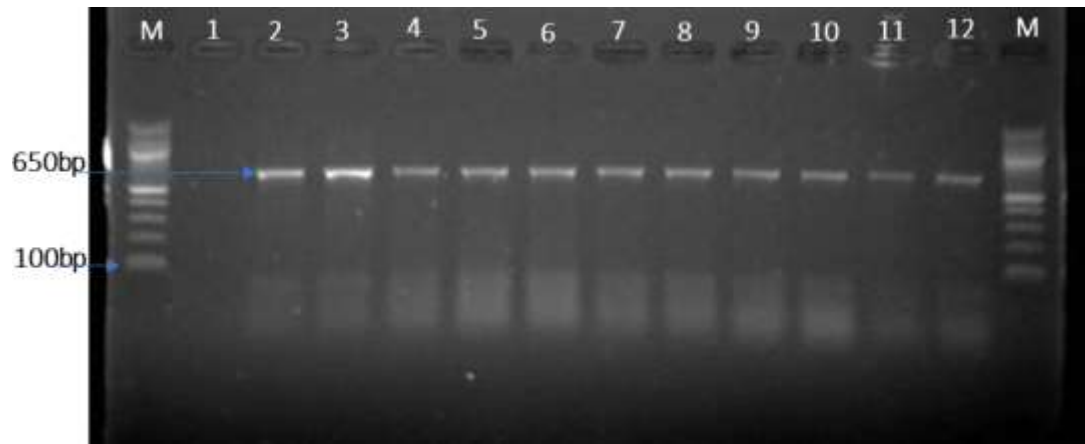

**S3h Fig.** Gel image of the *actA* (650 bp) gene of *L. monocytogenes*. Lane M: 100 bp DNA ladder, lane 1: -ve control, lane 2-12 *hly* gene.
